# Supplementary material for: A three-part bias correction of simulated European river runoff to force ocean models
Source: Copernicus journal article supplement (doi:10.5194/egusphere-2024-1774), 2024-06-12
Supplement: Supplementary file [file egusphere-2024-1774-AC3-supplement.pdf]

897

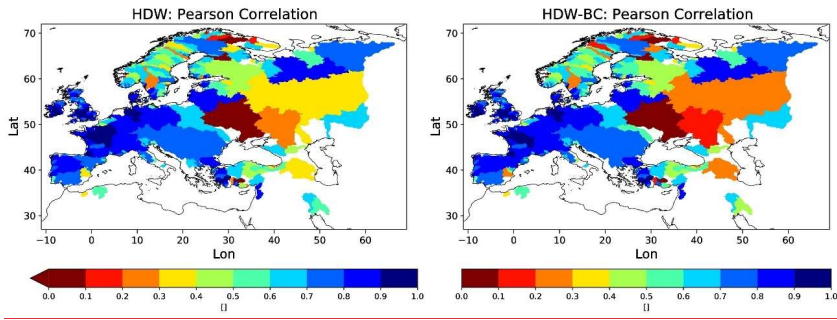

898

899

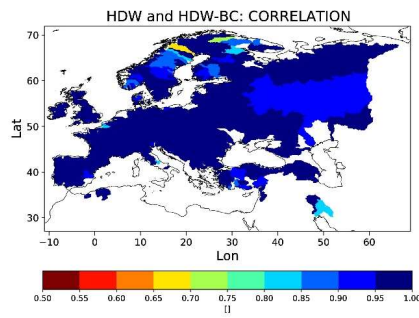

900

901 **Figure S1: Correlation of a) HDW and b) HDW-BC with observations as well as c)**  
902 **HDW with HDW-BC from 1979-2014.**

903

904
